# Supplementary material for: Gender differences in high school students’ perceived values and costs of learning chemistry
Source: Royal Society of Chemistry journal article supplement (doi:10.1039/d2rp00169a), 2022-10-11
Supplement: d2rp00169a1.pdf [file d2rp00169a1.pdf]

## Appendix 1. Survey items for measuring six types of values

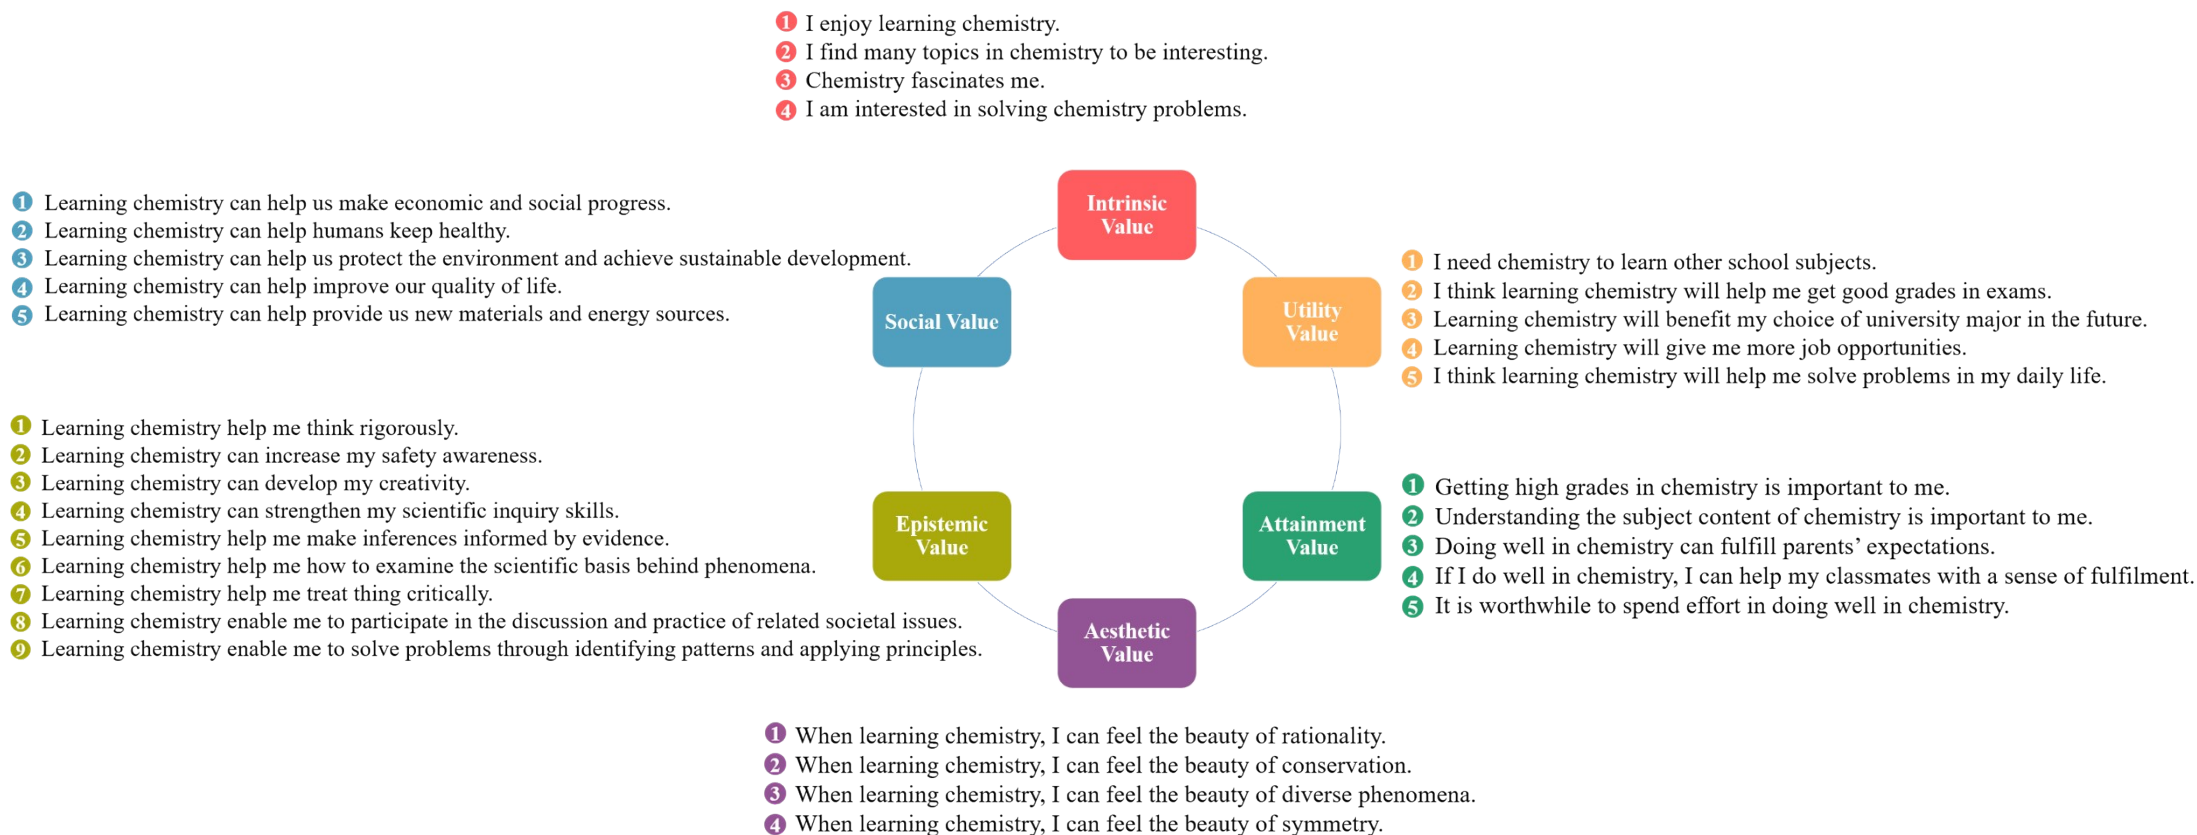

Note: Colors representing different types of values were matched with colors in MDS maps.

---

## Appendix 2. Survey items for measuring cost

1. Doing well in chemistry requires more effort than I want to put into it.
2. I have to give up other activities that I like to do well in chemistry.
3. I have to sacrifice a lot of free time to be good at chemistry.
4. When learning chemistry, I loss more than I gain.
5. Chemistry exams scare me.
6. Studying chemistry makes me feel stress.
7. Teachers or parents would be disappointed in me if I performed poorly in chemistry.
8. Others would think I am incompetent if I get low grades in chemistry.

Appendix 3. Confirmatory factor analysis output for value items

| Factors                   | Items | Standardized<br>loading estimates | S.E.  |
|---------------------------|-------|-----------------------------------|-------|
| Intrinsic Value<br>(IV)   | IV1   | 0.939                             | 0.010 |
|                           | IV2   | 0.911                             | 0.012 |
|                           | IV3   | 0.926                             | 0.016 |
|                           | IV4   | 0.876                             | 0.017 |
| Utility Value<br>(UV)     | UV1   | 0.694                             | 0.056 |
|                           | UV2   | 0.623                             | 0.045 |
|                           | UV3   | 0.863                             | 0.045 |
|                           | UV4   | 0.848                             | 0.048 |
|                           | UV5   | 0.621                             | 0.063 |
| Attainment Value<br>(AtV) | AtV1  | 0.734                             | 0.041 |
|                           | AtV2  | 0.815                             | 0.028 |
|                           | AtV3  | 0.615                             | 0.041 |
|                           | AtV4  | 0.688                             | 0.034 |
|                           | AtV5  | 0.687                             | 0.043 |
| Aesthetic Value<br>(AeV)  | AeV1  | 0.855                             | 0.032 |
|                           | AeV2  | 0.821                             | 0.034 |
|                           | AeV3  | 0.944                             | 0.013 |
|                           | AeV4  | 0.870                             | 0.027 |
| Epistemic Value<br>(EV)   | EV1   | 0.877                             | 0.016 |
|                           | EV2   | 0.792                             | 0.031 |
|                           | EV3   | 0.823                             | 0.029 |
|                           | EV4   | 0.878                             | 0.020 |
|                           | EV5   | 0.860                             | 0.023 |
|                           | EV6   | 0.870                             | 0.019 |
|                           | EV7   | 0.833                             | 0.026 |
|                           | EV8   | 0.751                             | 0.028 |
|                           | EV9   | 0.810                             | 0.026 |
| Social Value<br>(SV)      | SV1   | 0.786                             | 0.032 |
|                           | SV2   | 0.839                             | 0.032 |
|                           | SV3   | 0.916                             | 0.020 |
|                           | SV4   | 0.904                             | 0.034 |
|                           | SV5   | 0.909                             | 0.019 |

Appendix 4. Hierarchical multiple regression output for significant variables predicting chemistry achievement

| Variable                     | B     | SE   | $\beta$ | <i>p</i> |
|------------------------------|-------|------|---------|----------|
| Step 1                       |       |      |         |          |
| Age                          | .328  | .086 | .177    | .000     |
| Female                       | -.760 | .126 | -.283   | .000     |
| Step 2                       |       |      |         |          |
| Age                          | .212  | .078 | .115    | .007     |
| Female                       | -.477 | .115 | -.177   | .000     |
| Intrinsic Value              | .342  | .046 | .347    | .000     |
| Cost                         | -.259 | .055 | -.196   | .000     |
| Social Value                 | .121  | .062 | .087    | .051     |
| Step 3                       |       |      |         |          |
| Age                          | .247  | .078 | .134    | .002     |
| Female                       | -.467 | .114 | -.174   | .000     |
| Intrinsic Value              | .338  | .045 | .344    | .000     |
| Cost                         | -.250 | .055 | -.189   | .000     |
| Social Value                 | .267  | .081 | .191    | .001     |
| Social Value $\times$ Female | -.305 | .109 | -.155   | .005     |

Note:  $R^2 = 0.124$  for Step 1;  $\Delta R^2 = 0.197$  for Step 2;  $\Delta R^2 = 0.013$  for Step 3.
